# Supplementary material for: Evaluation of the Pharmacokinetic Interaction and Safety of Atogepant Co-Administered with Acetaminophen or Naproxen in Healthy Participants: A Randomized Trial
Source: PubMed Central journal article supplement — Clin Drug Investig. 2021 May 5;41(6):557–67. doi: 10.1007/s40261-021-01034-5 (PMC8195918; doi:10.1007/s40261-021-01034-5), 2021-05-05
Supplement: 40261_2021_1034_MOESM1_ESM.pdf [file 40261_2021_1034_MOESM1_ESM.pdf]

## SUPPLEMENTARY MATERIAL

### *Clinical Drug Investigation*

#### **Evaluation of the Pharmacokinetic Interaction and Safety of Atogepant Coadministered With Acetaminophen or Naproxen: A Randomized Trial**

Ramesh Boinpally<sup>1</sup>, John Spaventa<sup>1</sup>, Kayla Chen<sup>2</sup>, Matthew Butler<sup>3</sup>

<sup>1</sup>Clinical Pharmacology, AbbVie, Madison, NJ, USA; <sup>2</sup>Data & Statistical Sciences, AbbVie, Madison, NJ, USA; <sup>3</sup>Global Patient Safety & Epidemiology, AbbVie, Madison, NJ, USA

#### **Corresponding Author:**

Ramesh Boinpally, PhD

Ramesh.Boinpally@AbbVie.com

**Table S1. Intervention Sequences**

| Sequence | Period 1 | Period 2 | Period 3 | Period 4 | Period 5 |
|----------|----------|----------|----------|----------|----------|
| I        | A        | B        | E        | C        | D        |
| II       | B        | C        | A        | D        | E        |
| III      | C        | D        | B        | E        | A        |
| IV       | D        | E        | C        | A        | B        |
| V        | E        | A        | D        | B        | C        |
| VI       | D        | C        | E        | B        | A        |
| VII      | E        | D        | A        | C        | B        |
| VIII     | A        | E        | B        | D        | C        |
| IX       | B        | A        | C        | E        | D        |
| X        | C        | B        | D        | A        | E        |

Intervention A: Single dose of 60 mg atogepant.

Intervention B: Single dose of 1000 mg acetaminophen.

Intervention C: Coadministration of 60 mg atogepant and 1000 mg acetaminophen.

Intervention D: Single dose of 500 mg naproxen.

Intervention E: Coadministration of 60 mg atogepant and 500 mg naproxen.
